# Supplementary material
Source: PubMed Central journal article supplement (PMC7250728)
Supplement: NIHMS1574874-supplement-1.pdf [file NIHMS1574874-supplement-1.pdf]

**eTable 1. Main characteristics of study participants.**

|                                          | Controls<br>(n=235) | Cases<br>(n=237)    |
|------------------------------------------|---------------------|---------------------|
| Age (years)                              | 11.8 (1.9)          | 11.5 (1.8)*         |
| Male sex                                 | 109 (46.4)          | 134 (56.3)*         |
| Body mass index z-score                  | 0.55 (1.0)          | 0.73 (1.1)          |
| Household income $\geq$ \$15,000/year    | 97 (42.5)           | 85 (36.3)           |
| Current second-hand smoke exposure       | 78 (33.2)           | 101 (42.8)*         |
| FEV <sub>1</sub> percent predicted       | 97.9 (14.6)         | 93.3 (13.6)*        |
| FEV <sub>1</sub> /FVC, percent predicted | 97.4 (89.2, 100.7)  | 93.0 (86.6, 98.1)** |
| Bronchodilator response <sup>‡</sup>     | 3.8 (6.8)           | 4.0 (8.5)           |
| High chronic stress                      | 44 (18.7)           | 59 (25.2)           |
| Lifetime ETV <sup>†</sup> scale          | 3 (1, 5)            | 4 (2, 5)*           |

Values are presented as n (%) for binary variables, mean (SD) for normally distributed continuous variables, or median (interquartile range) for non-normally distributed continuous variables.

<sup>‡</sup>Percent change in FEV<sub>1</sub> after administration of albuterol.

<sup>¥</sup>A Checklist of Children's Distress Symptoms questionnaire score in the upper quartile

<sup>†</sup>Exposure to Violence (ETV)

\* p < 0.05 and \*\* p < 0.01 for comparison between cases and controls.
